# Supplementary material
Source: HighWire-hosted journal article supplement (http://www.cmaj.ca/highwire/filestream/57974/field_highwire_adjunct_files/3/cluster-lee-4-at.pdf)
Supplement: cluster-lee-4-at.pdf [file cluster-lee-4-at.pdf]

| <b>Appendix 4 (as supplied by authors): Interventions selected by the Pulmonary Group</b>                 |   |   |   |   |   |   |
|-----------------------------------------------------------------------------------------------------------|---|---|---|---|---|---|
| Hospital                                                                                                  | G | H | I | J | K | L |
| <b>1. Antenatal management</b>                                                                            |   |   |   |   |   |   |
| Implement antenatal steroid treatment protocol                                                            | P | P | P | X | P | P |
| Treat ureaplasma infections in pregnant women with erythromycin                                           | O | O | O | O | O | X |
| Antibiotics to women with prelabour rupture of the membranes preterm                                      | O | O | X | P | X | X |
| <b>2. Delivery room and resuscitation practices</b>                                                       |   |   |   |   |   |   |
| Team of neonatologist (or fellow), nurse and respiratory therapist to attend high risk deliveries         | P | P | P | P | P | P |
| Prophylactic surfactant treatment within 30 minutes of birth for infants <28 weeks or <1250g birth weight | X | X | O | X | P | X |
| Restrict hand ventilation                                                                                 | X | X | O | X | P | X |
| Limit tidal volume used in hand ventilation                                                               | X | O | O | P | O | X |
| Use of Laerdal bags with PEEP                                                                             | O | O | O | O | O | X |
| Restrict exposure to oxygen by using blended gas                                                          | O | X | O | P | P | X |
| <b>3. Continuous Positive Airway Pressure (CPAP)</b>                                                      |   |   |   |   |   |   |
| Adopt algorithm for CPAP use                                                                              | O | X | O | X | O | O |
| Early use of CPAP among infants needing supplemental oxygen                                               | O | O | X | P | P | X |
| Emphasize liberal use of CPAP instead of mechanical ventilation                                           | O | X | X | P | O | O |
| Employ long-term CPAP treatment strategy                                                                  | O | O | O | P | O | O |
| Avoid re-intubation if on treatment with CPAP                                                             | O | O | O | X | O | O |
| <b>4. Mechanical ventilation</b>                                                                          |   |   |   |   |   |   |
| Adopt algorithm for mechanical ventilation                                                                | O | X | O | X | O | O |
| Early use of high frequency ventilation when needed                                                       | O | O | X | P | O | O |
| Limit tidal volumes used                                                                                  | O | O | X | P | O | O |
| Adopt trigger ventilation and volume guarantee modes                                                      | O | O | X | P | O | P |
| Aggressive weaning of mechanical ventilation                                                              | O | O | O | P | O | O |
| Early extubation to CPAP                                                                                  | O | P | O | P | O | O |
| <b>5. Blood gases</b>                                                                                     |   |   |   |   |   |   |
| Adopt algorithm for blood gas monitoring                                                                  | O | X | O | O | O | O |
| Minimize blood sampling for gases                                                                         | O | O | O | O | O | O |
| Adopt normocarbica policy (Keep pCO <sub>2</sub> between 40 to 55 mm Hg)                                  | X | X | X | X | O | O |
| <b>6. Oxygen and oxygen saturation</b>                                                                    |   |   |   |   |   |   |
| Treat oxygen as a drug                                                                                    | O | O | O | P | P | O |
| Physician orders required for use of oxygen                                                               | O | O | O | P | O | O |
| Goal to keep oxygen saturation between 88%–92%                                                            | X | P | X | X | X | X |
| Set alarm limits between 85% and 95%                                                                      | X | X | O | P | X | X |
| <b>7. Fluids and nutrition</b>                                                                            |   |   |   |   |   |   |
| Adopt high humidity environment                                                                           | O | P | O | P | O | O |
| Restrict fluid intake                                                                                     | O | P | O | P | O | X |
| Avoid volume expansion to treat hypotension                                                               | O | O | O | O | O | O |
| Early parenteral protein and lipid nutrition within 4 hours after birth                                   | O | X | X | O | X | X |
| Maximize caloric intake                                                                                   | O | P | X | P | O | O |
| Early enteral nutrition                                                                                   | O | X | O | P | P | X |
| Promote use of breast milk                                                                                | O | P | P | P | O | P |
| <b>8. Environment</b>                                                                                     |   |   |   |   |   |   |
| Adopt pain management protocol                                                                            | O | O | O | O | O | O |
| Minimize noise in NICU                                                                                    | O | O | P | P | X | O |
| Adopt NIDCAP protocol                                                                                     | O | O | O | O | O | O |
| Employ massage therapy                                                                                    | O | O | O | O | O | O |
| Provide comment cards to parents and pay attention to feedback                                            | O | O | O | X | O | O |

P=intervention introduced prior to EPIQ study; X=Intervention introduced during EPIQ study; O=no systematic policy in place
